# Supplementary material for: Formation and subdivision of the head field in the centipede Strigamia maritima, as revealed by the expression of head gap gene orthologues and hedgehog dynamics
Source: PubMed Central journal article supplement (PMC5654096; doi:10.1186/s13227-017-0082-x), 2017-10-23

Figure S3

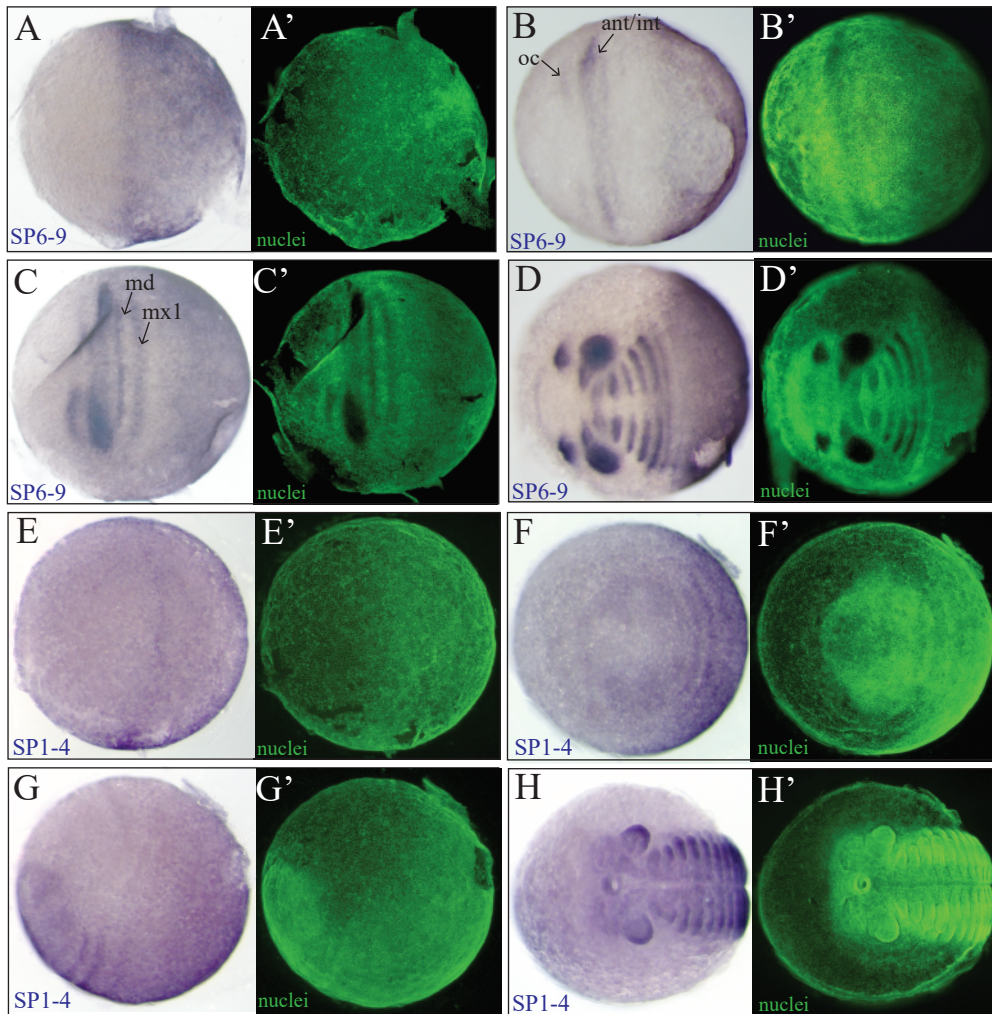

Supplement: 13227_2017_82_MOESM4_ESM.pdf [file 13227_2017_82_MOESM4_ESM.pdf]
